# Supplementary material for: Simple models to include influenza vaccination history when evaluating the effect of influenza vaccination
Source: PubMed Central journal article supplement (PMC8365179; doi:10.2807/1560-7917.es.2021.26.32.2001099), 2021-08-12
Supplement: 20-01099_CATALAN_Supplement.pdf [file 20-01099_CATALAN_Supplement.pdf]

"This supplementary material is hosted by Eurosurveillance as supporting information alongside the article [Management of influenza vaccination history in evaluating the effect of influenza vaccination], on behalf of the authors, who remain responsible for the accuracy and appropriateness of the content. The same standards for ethics, copyright, attributions and permissions as for the article apply. Supplements are not edited by Eurosurveillance and the journal is not responsible for the maintenance of any links or email addresses provided therein."

**Supplementary Table S1. Percentage of virus (sub-)type by influenza season in Navarre, Spain, 2011/12 to 2018/19**

| <b>Influenza season</b> | <b>A/H3N2</b> | <b>A/H1N1</b> | <b>B</b> |
|-------------------------|---------------|---------------|----------|
| 2011/12                 | 93.7          | 0.3           | 6.0      |
| 2012/13                 | 6.0           | 25.4          | 68.6     |
| 2013/14                 | 61.2          | 38.8          | 0.0      |
| 2014/15                 | 50.9          | 1.9           | 47.2     |
| 2015/16                 | 8.3           | 74.6          | 17.1     |
| 2016/17                 | 98.6          | 0.0           | 1.4      |
| 2017/18                 | 29.5          | 6.5           | 64.0     |
| 2018/19                 | 47.0          | 52.5          | 0.6      |
| Total                   | 47.1          | 26.2          | 26.7     |

**Supplementary Table S2. Sensitivity analysis of effect of current season influenza vaccination and of vaccination history including the diagnoses of influenza-like illness during the preceding season, Navarre, Spain, pooled analysis of the 2011/12 to 2018/19 (n=10,356)**

| <b>Vaccination status and ILI diagnoses in the preceding season</b> | <b>No. of cases / controls</b> | <b>Vaccination effect, % (95% CI)<sup>a</sup></b> | <b>p value</b> |
|---------------------------------------------------------------------|--------------------------------|---------------------------------------------------|----------------|
| <b>Primary healthcare patients</b>                                  |                                |                                                   |                |
| <b>Vaccination status</b>                                           |                                |                                                   |                |
| Never vaccinated                                                    | 2345/1135                      | 0 (ref)                                           |                |
| 1–2 prior and no current                                            | 103/79                         | 37 (14 to 54)                                     | 0.004          |
| 3–5 prior and no current                                            | 26/31                          | 63 (35 to 78)                                     | <0.001         |
| Current and no prior                                                | 53/59                          | 59 (40 to 73)                                     | <0.001         |
| 1–2 prior and current                                               | 67/58                          | 46 (21 to 63)                                     | 0.001          |
| 3–5 prior and current                                               | 278/178                        | 29 (8 to 45)                                      | 0.009          |
| <b>ILI diagnosis in the preceding season</b>                        | 112/107                        | 49 (32 to 62)                                     | <0.001         |
| <b>Hospitalized patients</b>                                        |                                |                                                   |                |
| <b>Vaccination status</b>                                           |                                |                                                   |                |
| Never vaccinated                                                    | 744/1094                       | 0 (ref)                                           |                |
| 1–2 prior and no current                                            | 134/257                        | 25 (5 to 41)                                      | 0.017          |
| 3–5 prior and no current                                            | 148/308                        | 39 (24 to 52)                                     | <0.001         |
| Current and no prior                                                | 49/122                         | 39 (13 to 57)                                     | 0.007          |
| 1–2 prior and current                                               | 98/231                         | 42 (24 to 56)                                     | <0.001         |
| 3–5 prior and current                                               | 896/1863                       | 39 (29 to 47)                                     | <0.001         |
| <b>ILI diagnosis in the preceding season</b>                        | 23/60                          | 24 (-22 to 55)                                    | 0.239          |
| <b>Influenza A/H1N1</b>                                             |                                |                                                   |                |
| <b>Vaccination status</b>                                           |                                |                                                   |                |
| Never vaccinated                                                    | 902/1507                       | 0 (ref)                                           |                |
| 1–2 prior and no current                                            | 72/228                         | 24 (-5 to 45)                                     | 0.094          |
| 3–5 prior and no current                                            | 38/233                         | 46 (20 to 64)                                     | 0.002          |
| Current and no prior                                                | 32/127                         | 45 (14 to 65)                                     | 0.009          |
| 1–2 prior and current                                               | 28/216                         | 62 (41 to 76)                                     | <0.001         |
| 3–5 prior and current                                               | 207/1509                       | 53 (41 to 63)                                     | <0.001         |
| <b>ILI diagnosis in the preceding season</b>                        | 35/113                         | 55 (30 to 71)                                     | <0.001         |
| <b>Influenza A/H3N2</b>                                             |                                |                                                   |                |
| <b>Vaccination status</b>                                           |                                |                                                   |                |
| Never vaccinated                                                    | 1280/2060                      | 0 (ref)                                           |                |
| 1–2 prior and no current                                            | 115/323                        | 21 (-2 to 38)                                     | 0.071          |
| 3–5 prior and no current                                            | 87/333                         | 39 (19 to 54)                                     | 0.001          |
| Current and no prior                                                | 52/177                         | 36 (8 to 55)                                      | 0.014          |
| 1–2 prior and current                                               | 90/277                         | 27 (3 to 45)                                      | 0.027          |
| 3–5 prior and current                                               | 681/1987                       | 22 (8 to 33)                                      | 0.003          |
| <b>ILI diagnosis in the preceding season</b>                        | 56/150                         | 43 (19 to 60)                                     | 0.001          |
| <b>Influenza B</b>                                                  |                                |                                                   |                |
| <b>Vaccination status</b>                                           |                                |                                                   |                |
| Never vaccinated                                                    | 869/1277                       | 0 (ref)                                           |                |
| 1–2 prior and no current                                            | 49/175                         | 48 (25 to 64)                                     | <0.001         |
| 3–5 prior and no current                                            | 46/164                         | 38 (9 to 58)                                      | 0.015          |
| Current and no prior                                                | 18/94                          | 72 (52 to 84)                                     | <0.001         |
| 1–2 prior and current                                               | 46/157                         | 49 (25 to 65)                                     | 0.001          |
| 3–5 prior and current                                               | 273/978                        | 49 (36 to 60)                                     | <0.001         |
| <b>ILI diagnosis in the preceding season</b>                        | 43/97                          | 32 (-3 to 55)                                     | 0.069          |

CI: confidence interval; ILI: influenza-like illness.

<sup>a</sup> Vaccination effect adjusted by age groups (9–44, 45–64, 65–84 and ≥85 years), major chronic conditions, healthcare setting (primary healthcare and hospital), and month-season of sample collection. Influenza A/H1N1 analysis includes 2012/13, 2013/14, 2015/16, 2017/18 and 2018/19 seasons. Influenza A/H3N2 analysis includes 2011/12, 2013/14, 2014/15, 2015/16, 2016/17, 2017/18 and 2018/19 seasons. Influenza B analysis includes 2011/12, 2012/13, 2014/15, 2015/16 and 2017/18 seasons.

**Supplementary Table S3. Effect of current season influenza vaccination and of vaccination history by age group, Navarre, Spain, pooled analysis of the 2011/12 to 2018/19 (n=10,356)**

|                                              | Aged 9–64 years         |                                             |         | Aged ≥65 years          |                                             |         |
|----------------------------------------------|-------------------------|---------------------------------------------|---------|-------------------------|---------------------------------------------|---------|
|                                              | No. of cases / controls | Vaccination effect, % (95% CI) <sup>a</sup> | p value | No. of cases / controls | Vaccination effect, % (95% CI) <sup>a</sup> | p value |
| <b>Only current vaccination</b>              |                         |                                             |         |                         |                                             |         |
| Unvaccinated                                 | 2820/1998               | 0 (ref)                                     |         | 680/906                 | 0 (ref)                                     |         |
| Vaccinated                                   | 306/475                 | 42 (31 to 51)                               | <0.001  | 1135/2036               | 24 (13 to 33)                               | <0.001  |
| <b>Summarized model with 1 prior season</b>  |                         |                                             |         |                         |                                             |         |
| Never vaccinated                             | 2762/1900               | 0 (ref)                                     |         | 571/675                 | 0 (ref)                                     |         |
| Prior and no current                         | 58/98                   | 35 (6 to 55)                                | 0.020   | 109/231                 | 40 (22 to 54)                               | <0.001  |
| Current regardless prior                     | 306/475                 | 43 (32 to 52)                               | <0.001  | 1135/2036               | 32 (21 to 41)                               | <0.001  |
| <b>Full model with 1 prior season</b>        |                         |                                             |         |                         |                                             |         |
| Never vaccinated                             | 2762/1900               | 0 (ref)                                     |         | 571/675                 | 0 (ref)                                     |         |
| Prior and no current                         | 58/98                   | 35 (6 to 55)                                | 0.022   | 109/231                 | 40 (22 to 54)                               | <0.001  |
| Current and no prior                         | 93/165                  | 52 (37 to 64)                               | <0.001  | 135/234                 | 29 (9 to 45)                                | 0.008   |
| Current and prior                            | 213/310                 | 37 (23 to 49)                               | <0.001  | 1000/1802               | 32 (22 to 41)                               | <0.001  |
| <b>Summarized model with 3 prior seasons</b> |                         |                                             |         |                         |                                             |         |
| Never vaccinated                             | 2692/1798               | 0 (ref)                                     |         | 487/487                 | 0 (ref)                                     |         |
| Any prior and no current                     | 128/200                 | 37 (19 to 51)                               | <0.001  | 193/353                 | 34 (18 to 47)                               | <0.001  |
| Current regardless prior                     | 306/475                 | 46 (34 to 53)                               | <0.001  | 1135/2036               | 34 (23 to 44)                               | <0.001  |
| <b>Full model with 3 prior seasons</b>       |                         |                                             |         |                         |                                             |         |
| Never vaccinated                             | 2692/1798               | 0 (ref)                                     |         | 487/553                 | 0 (ref)                                     |         |
| 1–2 prior and no current                     | 112/163                 | 34 (13 to 50) <sup>b</sup>                  | 0.003   | 123/199                 | 25 (1 to 42)                                | 0.040   |
| 3 prior and no current                       | 16/37                   | 53 (11 to 75)                               | 0.020   | 70/154                  | 46 (26 to 61)                               | <0.001  |
| Current and no prior                         | 63/120                  | 59 (42 to 70)                               | <0.001  | 55/95                   | 36 (7 to 56)                                | 0.019   |
| 1–2 prior and current                        | 105/170                 | 45 (27 to 58)                               | <0.001  | 247/461                 | 36 (21 to 48)                               | <0.001  |
| 3 prior and current                          | 138/185                 | 34 (15 to 49) <sup>b</sup>                  | 0.001   | 833/1480                | 34 (22 to 43)                               | <0.001  |
| <b>Summarized model with 5 prior seasons</b> |                         |                                             |         |                         |                                             |         |
| Never vaccinated                             | 2647/1733               | 0 (ref)                                     |         | 442/496                 | 0 (ref)                                     |         |
| Any prior and no current                     | 173/265                 | 39 (24 to 51)                               | <0.001  | 238/410                 | 31 (14 to 45)                               | 0.001   |
| Current regardless prior                     | 306/475                 | 45 (35 to 54)                               | <0.001  | 1135/2036               | 35 (24 to 44)                               | <0.001  |
| <b>Full model with 5 prior seasons</b>       |                         |                                             |         |                         |                                             |         |
| Never vaccinated                             | 2647/1733               | 0 (ref)                                     |         | 442/496                 | 0 (ref)                                     |         |
| 1–2 prior and no current                     | 130/184                 | 36 (17 to 50)                               | 0.001   | 107/152                 | 19 (-8 to 40)                               | 0.154   |
| 3–5 prior and no current                     | 43/81                   | 46 (19 to 64)                               | 0.003   | 131/258                 | 38 (20 to 52)                               | <0.001  |
| Current and no prior                         | 60/108                  | 58 (40 to 70)                               | <0.001  | 42/73                   | 35 (1 to 58)                                | 0.045   |
| 1–2 prior and current                        | 72/122                  | 51 (33 to 65)                               | <0.001  | 93/167                  | 36 (14 to 52)                               | 0.003   |
| 3–5 prior and current                        | 174/245                 | 36 (20 to 49) <sup>b</sup>                  | <0.001  | 1000/1796               | 35 (23 to 44)                               | <0.001  |

CI: confidence interval.

<sup>a</sup> Vaccination effect adjusted by age groups (9–44, 45–64, 65–84 and ≥85 years), major chronic conditions, healthcare setting (primary healthcare and hospital), and month-season of sample collection.

<sup>b</sup> P-value<0.05 for comparison with the category of current season vaccination and no prior doses.

**Supplementary Table S4. Effect of influenza vaccination in the current and prior seasons by (sub)type of influenza virus, Navarre, Spain, pooled analysis of the 2011/12 to 2018/19 (n=10,356)**

|                                              | Influenza A/H1N1        |                                             | Influenza A/H3N2        |                                             | Influenza B             |                                             |
|----------------------------------------------|-------------------------|---------------------------------------------|-------------------------|---------------------------------------------|-------------------------|---------------------------------------------|
|                                              | No. of cases / controls | Vaccination effect, % (95% CI) <sup>a</sup> | No. of cases / controls | Vaccination effect, % (95% CI) <sup>a</sup> | No. of cases / controls | Vaccination effect, % (95% CI) <sup>a</sup> |
| <b>Only-current-season model</b>             |                         |                                             |                         |                                             |                         |                                             |
| Unvaccinated                                 | 1012/1968               | 0 (ref)                                     | 1482/2716               | 0 (ref)                                     | 964/1616                | 0 (ref)                                     |
| Vaccinated                                   | 267/1852                | 47 (36 to 56)                               | 823/2441                | 14 (2 to 25)                                | 337/1229                | 44 (32 to 53)                               |
| <b>Summarized model with 1 prior season</b>  |                         |                                             |                         |                                             |                         |                                             |
| Never vaccinated                             | 971/1741                | 0 (ref)                                     | 1407/2391               | 0 (ref)                                     | 915/1447                | 0 (ref)                                     |
| Prior and no current                         | 41/227                  | 40 (12 to 59)                               | 75/325                  | 43 (24 to 57)                               | 49/169                  | 29 (-2 to 51)                               |
| Current regardless prior                     | 267/1852                | 51 (40 to 59)                               | 823/2441                | 21 (9 to 32)                                | 337/1229                | 47 (35 to 56)                               |
| <b>Full model with 1 prior season</b>        |                         |                                             |                         |                                             |                         |                                             |
| Never vaccinated                             | 971/1741                | 0 (ref)                                     | 1407/2391               | 0 (ref)                                     | 915/1447                | 0 (ref)                                     |
| Prior and no current                         | 41/227                  | 41 (13 to 60)                               | 75/325                  | 43 (24 to 57)                               | 49/169                  | 29 (-3 to 51) <sup>b</sup>                  |
| Current and no prior                         | 61/288                  | 37 (13 to 55)                               | 119/387                 | 28 (8 to 43)                                | 48/202                  | 60 (42 to 72)                               |
| Current and prior                            | 206/1564                | 54 (43 to 63)                               | 704/2054                | 20 (7 to 31)                                | 289/1027                | 43 (29 to 54)                               |
| <b>Summarized model with 3 prior seasons</b> |                         |                                             |                         |                                             |                         |                                             |
| Never vaccinated                             | 921/1596                | 0 (ref)                                     | 1333/2177               | 0 (ref)                                     | 887/1342                | 0 (ref)                                     |
| Any prior and no current                     | 91/372                  | 25 (1 to 44)                                | 149/539                 | 38 (23 to 51)                               | 77/274                  | 39 (17 to 55)                               |
| Current regardless prior                     | 267/1852                | 50 (39 to 60)                               | 823/2441                | 24 (13 to 35)                               | 337/1229                | 50 (39 to 59)                               |
| <b>Full model with 3 prior seasons</b>       |                         |                                             |                         |                                             |                         |                                             |
| Never vaccinated                             | 921/1596                | 0 (ref)                                     | 1333/2177               | 0 (ref)                                     | 887/1342                | 0 (ref)                                     |
| 1-2 prior and no current                     | 75/241                  | 11 (-22 to 35)                              | 106/350                 | 33 (13 to 48)                               | 52/178                  | 35 (7 to 55) <sup>b</sup>                   |
| 3 prior and no current                       | 16/131                  | 57 (24 to 76)                               | 43/189                  | 47 (24 to 64)                               | 25/96                   | 43 (6 to 65) <sup>b</sup>                   |
| Current and no prior                         | 35/153                  | 45 (16 to 64)                               | 62/210                  | 36 (11 to 54)                               | 21/114                  | 73 (55 to 84)                               |
| 1-2 prior and current                        | 64/470                  | 55 (39 to 67)                               | 194/609                 | 27 (10 to 40)                               | 92/309                  | 44 (25 to 58) <sup>b</sup>                  |
| 3 prior and current                          | 168/1229                | 51 (37 to 61)                               | 567/1622                | 22 (8 to 33)                                | 224/806                 | 47 (33 to 58) <sup>b</sup>                  |
| <b>Summarized model with 5 prior seasons</b> |                         |                                             |                         |                                             |                         |                                             |
| Never vaccinated                             | 902/1507                | 0 (ref)                                     | 1280/2060               | 0 (ref)                                     | 869/1277                | 0 (ref)                                     |
| Any prior and no current                     | 110/461                 | 33 (13 to 49)                               | 202/656                 | 30 (15 to 43)                               | 95/339                  | 45 (27 to 58)                               |
| Current regardless prior                     | 267/1852                | 53 (42 to 61)                               | 823/2441                | 24 (11 to 34)                               | 337/1229                | 53 (42 to 61)                               |
| <b>Full model with 5 prior seasons</b>       |                         |                                             |                         |                                             |                         |                                             |
| Never vaccinated                             | 902/1507                | 0 (ref)                                     | 1280/2060               | 0 (ref)                                     | 869/1277                | 0 (ref)                                     |
| 1-2 prior and no current                     | 72/228                  | 24 (-4 to 45)                               | 115/323                 | 21 (-1 to 39)                               | 49/175                  | 48 (25 to 64)                               |
| 3-5 prior and no current                     | 38/233                  | 45 (19 to 63)                               | 87/333                  | 39 (19 to 54)                               | 46/164                  | 38 (9 to 58)                                |
| Current and no prior                         | 32/127                  | 45 (13 to 65)                               | 52/177                  | 36 (9 to 55)                                | 18/94                   | 72 (52 to 84)                               |
| 1-2 prior and current                        | 28/216                  | 63 (42 to 76)                               | 90/277                  | 27 (4 to 45)                                | 46/157                  | 49 (26 to 65)                               |
| 3-5 prior and current                        | 207/1509                | 53 (40 to 62)                               | 681/1987                | 22 (8 to 33)                                | 273/978                 | 49 (36 to 60) <sup>b</sup>                  |

CI: confidence interval.

<sup>a</sup> Vaccination effect adjusted by age groups (9-44, 45-64, 65-84 and  $\geq 85$  years), major chronic conditions, healthcare setting (primary healthcare and hospital), and month-season of sample collection. Influenza A/H1N1 analysis includes 2012/13, 2013/14, 2015/16, 2017/18 and 2018/19 seasons. Influenza A/H3N2 analysis includes 2011/12, 2013/14, 2014/15, 2015/16, 2016/17, 2017/18 and 2018/19 seasons. Influenza B analysis includes 2011/12, 2012/13, 2014/15, 2015/16 and 2017/18 seasons.

<sup>b</sup> P-value <0.05 for comparison with the current season vaccination and no prior doses.

**Supplementary Table S5. Effect of current season influenza vaccination and of vaccination history by age group in preventing primary healthcare consultations for laboratory-confirmed influenza, Navarre, Spain, pooled analysis of the 2011/12 to 2018/19 (n=4,412)**

|                                              | Aged 9–64 years         |                                             |         | Aged ≥65 years          |                                             |         |
|----------------------------------------------|-------------------------|---------------------------------------------|---------|-------------------------|---------------------------------------------|---------|
|                                              | No. of cases / controls | Vaccination effect, % (95% CI) <sup>a</sup> | p value | No. of cases / controls | Vaccination effect, % (95% CI) <sup>a</sup> | p value |
| <b>Only current vaccination</b>              |                         |                                             |         |                         |                                             |         |
| Unvaccinated                                 | 2330/1169               | 0 (ref)                                     |         | 144/76                  | 0 (ref)                                     |         |
| Vaccinated                                   | 195/165                 | 41 (26 to 53)                               | <0.001  | 230/130                 | 18 (–22 to 45)                              | 0.321   |
| <b>Summarized model with 1 prior season</b>  |                         |                                             |         |                         |                                             |         |
| Never vaccinated                             | 2297/1144               | 0 (ref)                                     |         | 136/66                  | 0 (ref)                                     |         |
| Prior and no current                         | 33/25                   | 34 (–13 to 62)                              | 0.130   | 8/10                    | 58 (–18 to 85)                              | 0.100   |
| Current regardless prior                     | 195/165                 | 42 (26 to 54)                               | <0.001  | 230/130                 | 25 (–13 to 51)                              | 0.171   |
| <b>Full model with 1 prior season</b>        |                         |                                             |         |                         |                                             |         |
| Never vaccinated                             | 2297/1144               | 0 (ref)                                     |         | 136/66                  | 0 (ref)                                     |         |
| Prior and no current                         | 33/25                   | 34 (–14 to 62)                              | 0.136   | 8/10                    | 58 (–18 to 85)                              | 0.099   |
| Current and no prior                         | 62/70                   | 57 (39 to 70)                               | <0.001  | 23/14                   | 30 (–54 to 68)                              | 0.376   |
| Current and prior                            | 133/95                  | 30 (6 to 47)                                | 0.018   | 180/116                 | 25 (–16 to 51)                              | 0.194   |
| <b>Summarized model with 3 prior seasons</b> |                         |                                             |         |                         |                                             |         |
| Never vaccinated                             | 2263/1107               | 0 (ref)                                     |         | 122/61                  | 0 (ref)                                     |         |
| Any prior and no current                     | 67/62                   | 50 (28 to 65)                               | <0.001  | 22/15                   | 21 (–74 to 64)                              | 0.557   |
| Current regardless prior                     | 195/165                 | 43 (28 to 55)                               | <0.001  | 203/130                 | 22 (–20 to 50)                              | 0.257   |
| <b>Full model with 3 prior seasons</b>       |                         |                                             |         |                         |                                             |         |
| Never vaccinated                             | 2263/1107               | 0 (ref)                                     |         | 122/61                  | 0 (ref)                                     |         |
| 1–2 prior and no current                     | 61/52                   | 46 (20 to 63) <sup>b</sup>                  | 0.002   | 18/9                    | –5 (–170 to 56)                             | 0.863   |
| 3 prior and no current                       | 6/10                    | 71 (16 to 90)                               | 0.023   | 4/6                     | 66 (–36 to 92)                              | 0.127   |
| Current and no prior                         | 44/56                   | 67 (45 to 76)                               | <0.001  | 14/9                    | 33 (–73 to 74)                              | 0.406   |
| 1–2 prior and current                        | 70/55                   | 37 (7 to 57) <sup>b</sup>                   | 0.019   | 38/27                   | 33 (–28 to 65)                              | 0.221   |
| 3 prior and current                          | 81/54                   | 28 (–5 to 50) <sup>b</sup>                  | 0.086   | 151/94                  | 17 (–32 to 48)                              | 0.426   |
| <b>Summarized model with 5 prior seasons</b> |                         |                                             |         |                         |                                             |         |
| Never vaccinated                             | 2231/1081               | 0 (ref)                                     |         | 114/54                  | 0 (ref)                                     |         |
| Any prior and no current                     | 99/88                   | 47 (28 to 61)                               | <0.001  | 30/22                   | 39 (–22 to 69)                              | 0.165   |
| Current regardless prior                     | 195/165                 | 44 (29 to 55)                               | <0.001  | 203/130                 | 29 (–12 to 55)                              | 0.140   |
| <b>Full model with 5 prior seasons</b>       |                         |                                             |         |                         |                                             |         |
| Never vaccinated                             | 2231/1081               | 0 (ref)                                     |         | 114/54                  | 0 (ref)                                     |         |
| 1–2 prior and no current                     | 80/66                   | 41 (17 to 59)                               | 0.002   | 23/13                   | 12 (–75 to 65)                              | 0.552   |
| 3–5 prior and no current                     | 19/22                   | 63 (29 to 80)                               | 0.003   | 7/9                     | 63 (–13 to 88)                              | 0.080   |
| Current and no prior                         | 43/51                   | 61 (40 to 74)                               | <0.001  | 10/8                    | 53 (–35 to 84)                              | 0.160   |
| 1–2 prior and current                        | 52/44                   | 44 (15 to 64)                               | 0.007   | 15/14                   | 52 (–13 to 80)                              | 0.093   |
| 3–5 prior and current                        | 100/70                  | 30 (3 to 50) <sup>b</sup>                   | 0.003   | 178/108                 | 23 (–22 to 52)                              | 0.267   |

CI: confidence interval.

<sup>a</sup> Vaccination effect adjusted by age groups (9–44, 45–64, 65–84 and ≥85 years), major chronic conditions, and month-season of sample collection.

<sup>b</sup> P-value<0.05 for comparison with the category of current season vaccination and no prior doses.

**Supplementary Table S6. Effect of current season influenza vaccination and of vaccination history by age group in preventing hospitalization with laboratory-confirmed influenza, Navarre, Spain, pooled analysis of the 2011/12 to 2018/19 (n=5,944)**

|                                              | Aged 9–64 years         |                                             |         | Aged ≥65 years          |                                             |         |
|----------------------------------------------|-------------------------|---------------------------------------------|---------|-------------------------|---------------------------------------------|---------|
|                                              | No. of cases / controls | Vaccination effect, % (95% CI) <sup>a</sup> | P value | No. of cases / controls | Vaccination effect, % (95% CI) <sup>a</sup> | p value |
| <b>Only current vaccination</b>              |                         |                                             |         |                         |                                             |         |
| Unvaccinated                                 | 490/829                 | 0 (ref)                                     |         | 536/830                 | 0 (ref)                                     |         |
| Vaccinated                                   | 111/310                 | 44 (26 to 57)                               | <0.001  | 932/1906                | 24 (13 to 34)                               | <0.001  |
| <b>Summarized model with 1 prior season</b>  |                         |                                             |         |                         |                                             |         |
| Never vaccinated                             | 465/756                 | 0 (ref)                                     |         | 435/609                 | 0 (ref)                                     |         |
| Prior and no current                         | 25/75                   | 34 (–9 to 60)                               | 0.105   | 101/221                 | 39 (20 to 54)                               | <0.001  |
| Current regardless prior                     | 111/310                 | 46 (29 to 58)                               | <0.001  | 932/1906                | 33 (22 to 42)                               | <0.001  |
| <b>Full model with 1 prior season</b>        |                         |                                             |         |                         |                                             |         |
| Never vaccinated                             | 465/756                 | 0 (ref)                                     |         | 435/609                 | 0 (ref)                                     |         |
| Prior and no current                         | 25/73                   | 34 (–9 to 60)                               | 0.105   | 101/221                 | 39 (20 to 54)                               | <0.001  |
| Current and no prior                         | 31/95                   | 46 (16 to 66)                               | 0.007   | 112/220                 | 29 (7 to 46)                                | 0.012   |
| Current and prior                            | 80/215                  | 45 (26 to 60)                               | <0.001  | 820/1686                | 33 (22 to 43)                               | <0.001  |
| <b>Summarized model with 3 prior seasons</b> |                         |                                             |         |                         |                                             |         |
| Never vaccinated                             | 429/691                 | 0 (ref)                                     |         | 365/492                 | 0 (ref)                                     |         |
| Any prior and no current                     | 61/138                  | 25 (–7 to 48)                               | 0.108   | 171/338                 | 36 (18 to 49)                               | <0.001  |
| Current regardless prior                     | 111/310                 | 47 (30 to 60)                               | <0.001  | 932/1906                | 36 (24 to 45)                               | <0.001  |
| <b>Full model with 3 prior seasons</b>       |                         |                                             |         |                         |                                             |         |
| Never vaccinated                             | 429/691                 | 0 (ref)                                     |         | 365/492                 | 0 (ref)                                     |         |
| 1–2 prior and no current                     | 51/111                  | 22 (–15 to 47)                              | 0.212   | 105/190                 | 27 (2 to 45)                                | 0.033   |
| 3 prior and no current                       | 10/27                   | 40 (–32 to 83)                              | 0.205   | 66/148                  | 46 (25 to 61)                               | <0.001  |
| Current and no prior                         | 19/64                   | 50 (12 to 71)                               | 0.017   | 41/86                   | 36 (4 to 58)                                | 0.030   |
| 1–2 prior and current                        | 35/115                  | 53 (28 to 69)                               | 0.001   | 209/434                 | 37 (21 to 49)                               | <0.001  |
| 3 prior and current                          | 57/131                  | 40 (14 to 59)                               | 0.005   | 682/1386                | 35 (23 to 46)                               | <0.001  |
| <b>Summarized model with 5 prior seasons</b> |                         |                                             |         |                         |                                             |         |
| Never vaccinated                             | 416/652                 | 0 (ref)                                     |         | 328/442                 | 0 (ref)                                     |         |
| Any prior and no current                     | 74/177                  | 32 (5 to 51)                                | 0.021   | 208/388                 | 30 (12 to 45)                               | 0.002   |
| Current regardless prior                     | 111/310                 | 48 (32 to 61)                               | <0.001  | 932/1906                | 35 (23 to 46)                               | <0.001  |
| <b>Full model with 5 prior seasons</b>       |                         |                                             |         |                         |                                             |         |
| Never vaccinated                             | 416/652                 | 0 (ref)                                     |         | 328/442                 | 0 (ref)                                     |         |
| 1–2 prior and no current                     | 50/118                  | 31 (–1 to 53)                               | 0.057   | 84/139                  | 17 (–15 to 39)                              | 0.259   |
| 3–5 prior and no current                     | 24/59                   | 33 (–13 to 61)                              | 0.132   | 124/249                 | 38 (18 to 52)                               | 0.001   |
| Current and no prior                         | 17/57                   | 52 (13 to 73)                               | 0.016   | 32/65                   | 31 (–10 to 56)                              | 0.117   |
| 1–2 prior and current                        | 20/78                   | 60 (31 to 77)                               | 0.001   | 78/153                  | 33 (9 to 51)                                | 0.012   |
| 3–5 prior and current                        | 74/175                  | 43 (20 to 59)                               | 0.001   | 822/1688                | 36 (24 to 46)                               | <0.001  |

CI: confidence interval.

<sup>a</sup> Vaccination effect adjusted by age groups (9–44, 45–64, 65–84 and ≥85 years), major chronic conditions, and month-season of sample collection.

**Supplementary Table S7. Effect of influenza vaccination in the current and prior seasons in preventing primary healthcare consultations for laboratory-confirmed influenza by (sub)type of influenza virus, Navarre, Spain, pooled analysis of the 2011/12 to 2018/19 (n=4,412)**

|                                              | Influenza A/H1N1        |                                             | Influenza A/H3N2        |                                             | Influenza B             |                                             |
|----------------------------------------------|-------------------------|---------------------------------------------|-------------------------|---------------------------------------------|-------------------------|---------------------------------------------|
|                                              | No. of cases / controls | Vaccination effect, % (95% CI) <sup>a</sup> | No. of cases / controls | Vaccination effect, % (95% CI) <sup>a</sup> | No. of cases / controls | Vaccination effect, % (95% CI) <sup>a</sup> |
| <b>Only-current-season model</b>             |                         |                                             |                         |                                             |                         |                                             |
| Unvaccinated                                 | 677/751                 | 0 (ref)                                     | 1067/1106               | 0 (ref)                                     | 701/805                 | 0 (ref)                                     |
| Vaccinated                                   | 78/197                  | 39 (12 to 58)                               | 221/274                 | 23 (2 to 40)                                | 101/171                 | 45 (24 to 61)                               |
| <b>Summarized model with 1 prior season</b>  |                         |                                             |                         |                                             |                         |                                             |
| Never vaccinated                             | 663/733                 | 0 (ref)                                     | 1049/1071               | 0 (ref)                                     | 692/785                 | 0 (ref)                                     |
| Prior and no current                         | 14/18                   | 11 (-91 to 59)                              | 18/35                   | 51 (8 to 74)                                | 9/20                    | 41 (-41 to 76)                              |
| Current regardless prior                     | 78/197                  | 39 (12 to 58)                               | 221/274                 | 26 (5 to 42)                                | 101/171                 | 47 (25 to 62)                               |
| <b>Full model with 1 prior season</b>        |                         |                                             |                         |                                             |                         |                                             |
| Never vaccinated                             | 633/733                 | 0 (ref)                                     | 1049/1071               | 0 (ref)                                     | 692/785                 | 0 (ref)                                     |
| Prior and no current                         | 14/18                   | 12 (-89 to 59)                              | 18/35                   | 50 (6 to 73)                                | 9/20                    | 41 (-43 to 75)                              |
| Current and no prior                         | 27/56                   | 27 (-28 to 58)                              | 37/81                   | 53 (26 to 69)                               | 21/53                   | 65 (37 to 80)                               |
| Current and prior                            | 51/141                  | 45 (15 to 65)                               | 184/193                 | 12 (-17 to 34) <sup>b</sup>                 | 80/118                  | 37 (7 to 57)                                |
| <b>Summarized model with 3 prior seasons</b> |                         |                                             |                         |                                             |                         |                                             |
| Never vaccinated                             | 646/708                 | 0 (ref)                                     | 1206/1034               | 0 (ref)                                     | 684/763                 | 0 (ref)                                     |
| Any prior and no current                     | 31/43                   | 25 (-26 to 55)                              | 41/72                   | 51 (25 to 68)                               | 17/42                   | 49 (4 to 73)                                |
| Current regardless prior                     | 78/197                  | 40 (14 to 59)                               | 221/274                 | 29 (8 to 45)                                | 101/171                 | 48 (37 to 63)                               |
| <b>Full model with 3 prior seasons</b>       |                         |                                             |                         |                                             |                         |                                             |
| Never vaccinated                             | 646/708                 | 0 (ref)                                     | 1026/1034               | 0 (ref)                                     | 684/763                 | 0 (ref)                                     |
| 1-2 prior and no current                     | 29/36                   | 19 (-40 to 53)                              | 36/56                   | 43 (10 to 64)                               | 14/30                   | 46 (-9 to 73)                               |
| 3 prior and no current                       | 2/7                     | 65 (-91 to 94)                              | 5/16                    | 73 (18 to 91)                               | 3/12                    | 61 (-70 to 91)                              |
| Current and no prior                         | 19/40                   | 41 (-12 to 69)                              | 25/62                   | 60 (32 to 76)                               | 14/41                   | 70 (41 to 85)                               |
| 1-2 prior and current                        | 23/61                   | 31 (-24 to 61)                              | 51/76                   | 38 (7 to 58)                                | 34/43                   | 29 (-20 to 58) <sup>b</sup>                 |
| 3 prior and current                          | 36/96                   | 47 (10 to 68)                               | 145/136                 | 3 (-34 to 30) <sup>b</sup>                  | 53/87                   | 46 (14 to 65)                               |
| <b>Summarized model with 5 prior seasons</b> |                         |                                             |                         |                                             |                         |                                             |
| Never vaccinated                             | 638/688                 | 0 (ref)                                     | 1002/1004               | 0 (ref)                                     | 676/738                 | 0 (ref)                                     |
| Any prior and no current                     | 39/63                   | 30 (-11 to 56)                              | 65/102                  | 42 (17 to 59)                               | 25/67                   | 60 (34 to 76)                               |
| Current regardless prior                     | 78/197                  | 41 (15 to 59)                               | 221/274                 | 29 (9 to 45)                                | 101/171                 | 50 (30 to 65)                               |
| <b>Full model with 5 prior seasons</b>       |                         |                                             |                         |                                             |                         |                                             |
| Never vaccinated                             | 638/688                 | 0 (ref)                                     | 1002/1004               | 0 (ref)                                     | 676/738                 | 0 (ref)                                     |
| 1-2 prior and no current                     | 32/50                   | 27 (-21 to 56)                              | 53/72                   | 21 (-1 to 39)                               | 18/47                   | 63 (34 to 79)                               |
| 3-5 prior and no current                     | 7/13                    | 42 (-59 to 79)                              | 12/30                   | 39 (19 to 54)                               | 7/20                    | 49 (-36 to 81)                              |
| Current and no prior                         | 18/38                   | 40 (-16 to 69)                              | 23/56                   | 36 (9 to 55)                                | 12/38                   | 72 (52 to 86)                               |
| 1-2 prior and current                        | 14/39                   | 38 (-27 to 69)                              | 33/52                   | 27 (4 to 45)                                | 20/31                   | 46 (-1 to 72)                               |
| 3-5 prior and current                        | 46/120                  | 43 (8 to 65)                                | 165/166                 | 22 (8 to 33) <sup>b</sup>                   | 69/102                  | 41 (10 to 61)                               |

CI: confidence interval.

<sup>a</sup> Vaccination effect adjusted by age groups (9-44, 45-64, 65-84 and ≥85 years), major chronic conditions, and month-season of sample collection. Influenza A/H1N1 analysis includes 2012/13, 2013/14, 2015/16, 2017/18 and 2018/19 seasons. Influenza A/H3N2 analysis includes 2011/12, 2013/14, 2014/15, 2015/16, 2016/17, 2017/18 and 2018/19 seasons. Influenza B analysis includes 2011/12, 2012/13, 2014/15, 2015/16 and 2017/18 seasons.

<sup>b</sup> P-value <0.05 for comparison with the current season vaccination and no prior doses.

**Supplementary Table S8. Effect of influenza vaccination in the current and prior seasons in preventing hospitalization with laboratory-confirmed influenza by (sub)type of influenza virus, Navarre, Spain, pooled analysis of the 2011/12 to 2018/19 (n=5,944)**

|                                              | Influenza A/H1N1        |                                             | Influenza A/H3N2        |                                             | Influenza B             |                                             |
|----------------------------------------------|-------------------------|---------------------------------------------|-------------------------|---------------------------------------------|-------------------------|---------------------------------------------|
|                                              | No. of cases / controls | Vaccination effect, % (95% CI) <sup>a</sup> | No. of cases / controls | Vaccination effect, % (95% CI) <sup>a</sup> | No. of cases / controls | Vaccination effect, % (95% CI) <sup>a</sup> |
| <b>Only-current-season model</b>             |                         |                                             |                         |                                             |                         |                                             |
| Unvaccinated                                 | 335/1217                | 0 (ref)                                     | 415/1610                | 0 (ref)                                     | 263/811                 | 0 (ref)                                     |
| Vaccinated                                   | 189/1655                | 49 (36 to 59)                               | 602/2167                | 9 (-7 to 23)                                | 236/1058                | 43 (39 to 55)                               |
| <b>Summarized model with 1 prior season</b>  |                         |                                             |                         |                                             |                         |                                             |
| Never vaccinated                             | 308/1008                | 0 (ref)                                     | 358/1320                | 0 (ref)                                     | 223/662                 | 0 (ref)                                     |
| Prior and no current                         | 27/209                  | 47 (16 to 66)                               | 57/290                  | 41 (18 to 57)                               | 40/149                  | 27 (-11 to 52)                              |
| Current regardless prior                     | 189/1655                | 54 (42 to 64)                               | 602/2167                | 19 (3 to 31)                                | 236/1058                | 47 (32 to 59)                               |
| <b>Full model with 1 prior season</b>        |                         |                                             |                         |                                             |                         |                                             |
| Never vaccinated                             | 308/1008                | 0 (ref)                                     | 358/1320                | 0 (ref)                                     | 223/662                 | 0 (ref)                                     |
| Prior and no current                         | 27/209                  | 47 (16 to 67)                               | 57/290                  | 41 (18 to 57) <sup>b</sup>                  | 40/149                  | 27 (-11 to 52)                              |
| Current and no prior                         | 34/232                  | 41 (10 to 61)                               | 82/306                  | 12 (-18 to 37)                              | 27/149                  | 57 (32 to 73)                               |
| Current and prior                            | 155/1423                | 57 (44 to 67)                               | 520/1861                | 20 (4 to 33)                                | 209/909                 | 45 (29 to 58)                               |
| <b>Summarized model with 3 prior seasons</b> |                         |                                             |                         |                                             |                         |                                             |
| Never vaccinated                             | 275/888                 | 0 (ref)                                     | 307/1143                | 0 (ref)                                     | 203/579                 | 0 (ref)                                     |
| Any prior and no current                     | 60/329                  | 26 (-4 to 48)                               | 108/467                 | 34 (13 to 49)                               | 60/232                  | 37 (9 to 56)                                |
| Current regardless prior                     | 189/1655                | 53 (40 to 64) <sup>b</sup>                  | 602/2167                | 21 (5 to 34)                                | 236/1058                | 52 (37 to 63)                               |
| <b>Full model with 3 prior seasons</b>       |                         |                                             |                         |                                             |                         |                                             |
| Never vaccinated                             | 275/888                 | 0 (ref)                                     | 307/1143                | 0 (ref)                                     | 203/579                 | 0 (ref)                                     |
| 1-2 prior and no current                     | 46/205                  | 8 (-37 to 38)                               | 70/294                  | 28 (2 to 47)                                | 38/148                  | 32 (-4 to 56) <sup>b</sup>                  |
| 3 prior and no current                       | 14/124                  | 56 (19 to 76)                               | 38/173                  | 43 (15 to 62)                               | 22/84                   | 44 (3 to 67)                                |
| Current and no prior                         | 16/113                  | 47 (6 to 71)                                | 37/148                  | 9 (-37 to 39)                               | 7/73                    | 78 (49 to 90)                               |
| 1-2 prior and current                        | 41/409                  | 60 (41 to 73)                               | 143/533                 | 22 (0 to 39)                                | 58/266                  | 50 (28 to 65)                               |
| 3 prior and current                          | 132/1133                | 52 (37 to 64)                               | 422/1486                | 23 (6 to 37)                                | 171/719                 | 49 (33 to 62) <sup>b</sup>                  |
| <b>Summarized model with 5 prior seasons</b> |                         |                                             |                         |                                             |                         |                                             |
| Never vaccinated                             | 264/819                 | 0 (ref)                                     | 278/1056                | 0 (ref)                                     | 193/539                 | 0 (ref)                                     |
| Any prior and no current                     | 71/398                  | 36 (12 to 54)                               | 137/554                 | 24 (2 to 41)                                | 70/272                  | 37 (11 to 56)                               |
| Current regardless prior                     | 189/1655                | 56 (44 to 66) <sup>b</sup>                  | 602/2167                | 19 (2 to 33)                                | 236/1058                | 53 (38 to 64)                               |
| <b>Full model with 5 prior seasons</b>       |                         |                                             |                         |                                             |                         |                                             |
| Never vaccinated                             | 264/819                 | 0 (ref)                                     | 278/1056                | 0 (ref)                                     | 193/539                 | 0 (ref)                                     |
| 1-2 prior and no current                     | 40/178                  | 24 (-16 to 49)                              | 62/251                  | 14 (-19 to 38)                              | 31/128                  | 36 (-1 to 59)                               |
| 3-5 prior and no current                     | 31/220                  | 48 (18 to 66)                               | 75/303                  | 31 (6 to 50)                                | 39/144                  | 38 (4 to 60)                                |
| Current and no prior                         | 14/89                   | 47 (2 to 72)                                | 29/121                  | 11 (-40 to 43)                              | 6/56                    | 74 (20 to 70)                               |
| 1-2 prior and current                        | 14/177                  | 70 (45 to 83)                               | 57/225                  | 14 (-21 to 49)                              | 26/126                  | 51 (20 to 70)                               |
| 3-5 prior and current                        | 161/1389                | 56 (42 to 66)                               | 516/1821                | 21 (3 to 35)                                | 204/876                 | 52 (36 to 63)                               |

CI: confidence interval.

<sup>a</sup> Vaccination effect adjusted by age groups (9-44, 45-64, 65-84 and ≥85 years), major chronic conditions, and month-season of sample collection. Influenza A/H1N1 analysis includes 2012/13, 2013/14, 2015/16, 2017/18 and 2018/19 seasons. Influenza A/H3N2 analysis includes 2011/12, 2013/14, 2014/15, 2015/16, 2016/17, 2017/18 and 2018/19 seasons. Influenza B analysis includes 2011/12, 2012/13, 2014/15, 2015/16 and 2017/18 seasons.

<sup>b</sup> P-value <0.05 for comparison with the current season vaccination and no prior doses.

**Supplementary Table S9a. Effect of current season influenza vaccination and of vaccination history by influenza season, Navarre, Spain**

|                                              | 2011/12 season          |                                             |         | 2012/13 season          |                                             |         |
|----------------------------------------------|-------------------------|---------------------------------------------|---------|-------------------------|---------------------------------------------|---------|
|                                              | No. of cases / controls | Vaccination effect, % (95% CI) <sup>a</sup> | P value | No. of cases / controls | Vaccination effect, % (95% CI) <sup>a</sup> | P value |
| <b>Only-current-season model</b>             |                         |                                             |         |                         |                                             |         |
| Unvaccinated                                 | 302/188                 | 0 (ref)                                     |         | 293/188                 | 0 (ref)                                     |         |
| Vaccinated                                   | 49/47                   | 20 (-47 to 57)                              | 0.467   | 22/70                   | 69 (41 to 83)                               | <0.001  |
| <b>Summarized model with 1 prior season</b>  |                         |                                             |         |                         |                                             |         |
| Never vaccinated                             | 299/177                 | 0 (ref)                                     |         | 284/184                 | 0 (ref)                                     |         |
| Prior and no current                         | 3/11                    | 81 (20 to 95)                               | 0.023   | 9/4                     | -326 (-1712 to -1)                          | 0.049   |
| Current regardless prior                     | 49/47                   | 29 (-32 to 62)                              | 0.280   | 22/70                   | 66 (36 to 82)                               | 0.001   |
| <b>Full model with 1 prior season</b>        |                         |                                             |         |                         |                                             |         |
| Never vaccinated                             | 299/177                 | 0 (ref)                                     |         | 284/184                 | 0 (ref)                                     |         |
| Prior and no current                         | 3/11                    | 81 (20 to 95)                               | 0.023   | 9/4                     | -326 (-1712 to 0)                           | 0.049   |
| Current and no prior                         | 6/7                     | 34 (-165 to 83)                             | 0.562   | 4/12                    | 64 (-21 to 89)                              | 0.097   |
| Current and prior                            | 43/40                   | 28 (-37 to 62)                              | 0.317   | 18/58                   | 67 (32 to 84)                               | 0.003   |
| <b>Summarized model with 3 prior seasons</b> |                         |                                             |         |                         |                                             |         |
| Never vaccinated                             | 293/167                 | 0 (ref)                                     |         | 279/174                 | 0 (ref)                                     |         |
| Any prior and no current                     | 9/21                    | 66 (15 to 86)                               | 0.020   | 14/14                   | 2 (-135 to 59)                              | 0.965   |
| Current regardless prior                     | 49/47                   | 33 (-26 to 64)                              | 0.218   | 22/70                   | 69 (41 to 84)                               | <0.001  |
| <b>Full model with 3 prior seasons</b>       |                         |                                             |         |                         |                                             |         |
| Never vaccinated                             | 293/167                 | 0 (ref)                                     |         | 279/174                 | 0 (ref)                                     |         |
| 1–2 prior and no current                     | 7/15                    | 61 (-11 to 86)                              | 0.078   | 10/12                   | 29 (-85 to 73)                              | 0.482   |
| 3 prior and no current                       | 2/6                     | 77 (-32 to 96)                              | 0.099   | 4/2                     | -307 (-2867 to 44)                          | 0.166   |
| Current and no prior                         | 3/4                     | 18 (-511 to 89)                             | 0.847   | 1/5                     | 86 (-26 to 98)                              | 0.079   |
| 1–2 prior and current                        | 13/10                   | -3 (-204 to 65)                             | 0.959   | 7/22                    | 65 (8 to 87)                                | 0.034   |
| 3 prior and current                          | 33/33                   | 43 (-16 to 72)                              | 0.118   | 14/43                   | 66 (24 to 85)                               | 0.009   |
| <b>Summarized model with 5 prior seasons</b> |                         |                                             |         |                         |                                             |         |
| Never vaccinated                             | 289/164                 | 0 (ref)                                     |         | 276/169                 | 0 (ref)                                     |         |
| Any prior and no current                     | 13/24                   | 60 (12 to 82)                               | 0.023   | 17/19                   | 22 (-68 to 64)                              | 0.525   |
| Current regardless prior                     | 49/47                   | 33 (-25 to 64)                              | 0.208   | 22/70                   | 70 (43 to 84)                               | <0.001  |
| <b>Full model with 5 prior seasons</b>       |                         |                                             |         |                         |                                             |         |
| Never vaccinated                             | 289/164                 | 0 (ref)                                     |         | 276/169                 | 0 (ref)                                     |         |
| 1–2 prior and no current                     | 9/14                    | 44 (-50 to 79)                              | 0.250   | 10/13                   | 44 (-39 to 77)                              | 0.213   |
| 3–5 prior and no current                     | 4/10                    | 78 (20 to 94)                               | 0.022   | 7/6                     | -63 (-500 to 56)                            | 0.463   |
| Current and no prior                         | 3/4                     | 20 (-500 to 89)                             | 0.831   | 1/4                     | 84 (-53 to 98)                              | 0.112   |
| 1–2 prior and current                        | 4/6                     | 48 (-140 to 89)                             | 0.404   | 4/12                    | 70 (-1 to 91)                               | 0.051   |
| 3–5 prior and current                        | 42/37                   | 32 (-35 to 65)                              | 0.272   | 17/54                   | 67 (30 to 84)                               | 0.004   |

CI: confidence interval.

<sup>a</sup> Vaccination effect adjusted by age groups (9–44, 45–64, 65–84 and ≥85 years), major chronic conditions, healthcare setting (primary healthcare and hospital), and month of sample collection.

**Supplementary Table S9b. Effect of current season influenza vaccination and of vaccination history by influenza season, Navarre, Spain**

|                                              | 2013/14 season          |                                             |         | 2014/15 season          |                                             |         |
|----------------------------------------------|-------------------------|---------------------------------------------|---------|-------------------------|---------------------------------------------|---------|
|                                              | No. of cases / controls | Vaccination effect, % (95% CI) <sup>a</sup> | p value | No. of cases / controls | Vaccination effect, % (95% CI) <sup>a</sup> | p value |
| <b>Only-current-season model</b>             |                         |                                             |         |                         |                                             |         |
| Unvaccinated                                 | 385/287                 | 0 (ref)                                     |         | 423/307                 | 0 (ref)                                     |         |
| Vaccinated                                   | 142/189                 | 28 (0 to 49)                                | 0.049   | 150/175                 | 15 (-19 to 39)                              | 0.350   |
| <b>Summarized model with 1 prior season</b>  |                         |                                             |         |                         |                                             |         |
| Never vaccinated                             | 362/265                 | 0 (ref)                                     |         | 408/274                 | 0 (ref)                                     |         |
| Prior and no current                         | 23/22                   | 11 (-74 to 54)                              | 0.733   | 15/33                   | 54 (9 to 77)                                | 0.026   |
| Current regardless prior                     | 142/189                 | 30 (0 to 50)                                | 0.047   | 150/175                 | 24 (-8 to 47)                               | 0.121   |
| <b>Full model with 1 prior season</b>        |                         |                                             |         |                         |                                             |         |
| Never vaccinated                             | 362/265                 | 0 (ref)                                     |         | 408/274                 | 0 (ref)                                     |         |
| Prior and no current                         | 23/22                   | 11 (-73 to 55)                              | 0.724   | 15/33                   | 54 (9 to 77)                                | 0.025   |
| Current and no prior                         | 23/32                   | 21 (-46 to 57)                              | 0.453   | 21/20                   | 9 (-80 to 54)                               | 0.781   |
| Current and prior                            | 119/157                 | 32 (1 to 53)                                | 0.043   | 129/155                 | 27 (-6 to 50)                               | 0.096   |
| <b>Summarized model with 3 prior seasons</b> |                         |                                             |         |                         |                                             |         |
| Never vaccinated                             | 338/245                 | 0 (ref)                                     |         | 397/257                 | 0 (ref)                                     |         |
| Any prior and no current                     | 47/42                   | 2 (-64 to 41)                               | 0.941   | 26/50                   | 55 (21 to 74)                               | 0.005   |
| Current regardless prior                     | 142/189                 | 29 (-3 to 51)                               | 0.067   | 150/175                 | 29 (-2 to 50)                               | 0.062   |
| <b>Full model with 3 prior seasons</b>       |                         |                                             |         |                         |                                             |         |
| Never vaccinated                             | 338/245                 | 0 (ref)                                     |         | 397/257                 | 0 (ref)                                     |         |
| 1–2 prior and no current                     | 36/31                   | -23 (-204 to 50)                            | 0.654   | 21/32                   | 45 (-1 to 71)                               | 0.055   |
| 3 prior and no current                       | 11/11                   | -26 (-249 to 55)                            | 0.661   | 5/18                    | 73 (23 to 91)                               | 0.015   |
| Current and no prior                         | 10/12                   | -9 (-280 to 69)                             | 0.893   | 5/13                    | 73 (21 to 91)                               | 0.018   |
| 1–2 prior and current                        | 38/58                   | 27 (-96 to 73)                              | 0.532   | 53/38                   | -11 (-84 to 33) <sup>b</sup>                | 0.682   |
| 3 prior and current                          | 94/119                  | 6 (-140 to 63)                              | 0.896   | 92/124                  | 38 (6 to 59)                                | 0.024   |
| <b>Summarized model with 5 prior seasons</b> |                         |                                             |         |                         |                                             |         |
| Never vaccinated                             | 327/232                 | 0 (ref)                                     |         | 383/238                 | 0 (ref)                                     |         |
| Any prior and no current                     | 58/55                   | 6 (-52 to 42)                               | 0.808   | 40/69                   | 55 (28 to 72)                               | 0.001   |
| Current regardless prior                     | 142/189                 | 30 (-2 to 52)                               | 0.063   | 150/175                 | 34 (4 to 54)                                | 0.028   |
| <b>Full model with 5 prior seasons</b>       |                         |                                             |         |                         |                                             |         |
| Never vaccinated                             | 327/232                 | 0 (ref)                                     |         | 383/238                 | 0 (ref)                                     |         |
| 1–2 prior and no current                     | 35/25                   | -19 (-120 to 35)                            | 0.576   | 24/36                   | 53 (17 to 74)                               | 0.010   |
| 3–5 prior and no current                     | 23/30                   | 29 (-36 to 63)                              | 0.297   | 16/33                   | 59 (18 to 80)                               | 0.012   |
| Current and no prior                         | 9/10                    | 18 (-116 to 69)                             | 0.688   | 5/9                     | 61 (-25 to 88)                              | 0.113   |
| 1–2 prior and current                        | 18/20                   | 34 (-36 to 68)                              | 0.265   | 29/19                   | -14 (-111 to 40)                            | 0.688   |
| 3–5 prior and current                        | 115/159                 | 32 (-3 to 55)                               | 0.068   | 116/147                 | 41 (11 to 61)                               | 0.011   |

CI: confidence interval.

<sup>a</sup> Vaccination effect adjusted by age groups (9–44, 45–64, 65–84 and ≥85 years), major chronic conditions, healthcare setting (primary healthcare and hospital), and month of sample collection.

<sup>b</sup> P value < 0.05 for comparison with the category of current season vaccination and no prior doses.

**Supplementary Table S9c. Effect of current season influenza vaccination and of vaccination history by influenza season, Navarre, Spain**

|                                              | 2015/16 season          |                                             |         | 2016/17 season          |                                             |         |
|----------------------------------------------|-------------------------|---------------------------------------------|---------|-------------------------|---------------------------------------------|---------|
|                                              | No. of cases / controls | Vaccination effect, % (95% CI) <sup>a</sup> | p value | No. of cases / controls | Vaccination effect, % (95% CI) <sup>a</sup> | p value |
| <b>Only-current-season model</b>             |                         |                                             |         |                         |                                             |         |
| Unvaccinated                                 | 582/398                 | 0 (ref)                                     |         | 388/441                 | 0 (ref)                                     |         |
| Vaccinated                                   | 152/305                 | 42 (22 to 56)                               | <0.001  | 274/437                 | 16 (-8 to 35)                               | 0.170   |
| <b>Summarized model with 1 prior season</b>  |                         |                                             |         |                         |                                             |         |
| Never vaccinated                             | 555/364                 | 0 (ref)                                     |         | 363/383                 | 0 (ref)                                     |         |
| Prior and no current                         | 27/34                   | 14 (-52 to 51)                              | 0.605   | 25/58                   | 49 (13 to 70)                               | 0.013   |
| Current regardless prior                     | 152/305                 | 43 (23 to 58)                               | <0.001  | 274/437                 | 25 (2 to 42)                                | 0.034   |
| <b>Full model with 1 prior season</b>        |                         |                                             |         |                         |                                             |         |
| Never vaccinated                             | 555/364                 | 0 (ref)                                     |         | 363/383                 | 0 (ref)                                     |         |
| Prior and no current                         | 27/34                   | 12 (-57 to 50)                              | 0.669   | 25/58                   | 48 (12 to 69)                               | 0.016   |
| Current and no prior                         | 26/53                   | 55 (25 to 73)                               | 0.003   | 42/84                   | 41 (9 to 62)                                | 0.016   |
| Current and prior                            | 126/252                 | 38 (14 to 56)                               | 0.005   | 232/353                 | 20 (-7 to 39)                               | 0.129   |
| <b>Summarized model with 3 prior seasons</b> |                         |                                             |         |                         |                                             |         |
| Never vaccinated                             | 538/344                 | 0 (ref)                                     |         | 340/331                 | 0 (ref)                                     |         |
| Any prior and no current                     | 44/54                   | 18 (-31 to 49)                              | 0.410   | 48/110                  | 52 (28 to 68)                               | <0.001  |
| Current regardless prior                     | 152/305                 | 44 (24 to 59)                               | <0.001  | 274/437                 | 32 (11 to 49)                               | 0.006   |
| <b>Full model with 3 prior seasons</b>       |                         |                                             |         |                         |                                             |         |
| Never vaccinated                             | 538/344                 | 0 (ref)                                     |         | 340/331                 | 0 (ref)                                     |         |
| 1–2 prior and no current                     | 34/33                   | -4 (-80 to 40)                              | 0.880   | 35/74                   | 46 (14 to 66)                               | 0.010   |
| 3 prior and no current                       | 10/21                   | 46 (-23 to 76)                              | 0.142   | 13/36                   | 62 (25 to 81)                               | 0.006   |
| Current and no prior                         | 15/35                   | 65 (32 to 82)                               | 0.002   | 24/45                   | 50 (13 to 71)                               | 0.014   |
| 1–2 prior and current                        | 31/78                   | 53 (24 to 71)                               | 0.002   | 58/113                  | 37 (6 to 58)                                | 0.024   |
| 3 prior and current                          | 106/192                 | 32 (2 to 53)                                | 0.036   | 192/279                 | 26 (-1 to 45)                               | 0.060   |
| <b>Summarized model with 5 prior seasons</b> |                         |                                             |         |                         |                                             |         |
| Never vaccinated                             | 524/325                 | 0 (ref)                                     |         | 331/320                 | 0 (ref)                                     |         |
| Any prior and no current                     | 58/73                   | 22 (-19 to 49)                              | 0.247   | 57/121                  | 48 (23 to 65)                               | 0.001   |
| Current regardless prior                     | 152/305                 | 46 (26 to 60)                               | <0.001  | 274/437                 | 32 (10 to 49)                               | 0.007   |
| <b>Full model with 5 prior seasons</b>       |                         |                                             |         |                         |                                             |         |
| Never vaccinated                             | 524/325                 | 0 (ref)                                     |         | 331/320                 | 0 (ref)                                     |         |
| 1–2 prior and no current                     | 42/39                   | -2 (-68 to 38)                              | 0.934   | 33/58                   | 35 (-6 to 60)                               | 0.087   |
| 3–5 prior and no current                     | 16/34                   | 45 (-7 to 72)                               | 0.079   | 24/63                   | 58 (28 to 76)                               | 0.002   |
| Current and no prior                         | 13/32                   | 69 (37 to 84)                               | 0.001   | 21/41                   | 50 (10 to 72)                               | 0.022   |
| 1–2 prior and current                        | 13/35                   | 61 (22 to 80)                               | 0.008   | 24/48                   | 47 (9 to 70)                                | 0.023   |
| 3–5 prior and current                        | 126/238                 | 36 (9 to 55)                                | 0.014   | 229/348                 | 26 (0 to 46)                                | 0.050   |

CI: confidence interval.

<sup>a</sup> Vaccination effect adjusted by age groups (9–44, 45–64, 65–84 and ≥85 years), major chronic conditions, healthcare setting (primary healthcare and hospital), and month of sample collection.

**Supplementary Table S9d. Effect of current season influenza vaccination and of vaccination history by influenza season, Navarre, Spain**

|                                              | 2017/18 season          |                                             |         | 2018/19 season          |                                             |         |
|----------------------------------------------|-------------------------|---------------------------------------------|---------|-------------------------|---------------------------------------------|---------|
|                                              | No. of cases / controls | Vaccination effect, % (95% CI) <sup>a</sup> | p value | No. of cases / controls | Vaccination effect, % (95% CI) <sup>a</sup> | p value |
| <b>Only-current-season model</b>             |                         |                                             |         |                         |                                             |         |
| Unvaccinated                                 | 647/535                 | 0 (ref)                                     |         | 480/560                 | 0 (ref)                                     |         |
| Vaccinated                                   | 397/632                 | 38 (23 to 49)                               | <0.001  | 255/656                 | 29 (10 to 44)                               | 0.005   |
| <b>Summarized model with 1 prior season</b>  |                         |                                             |         |                         |                                             |         |
| Never vaccinated                             | 605/448                 | 0 (ref)                                     |         | 457/480                 | 0 (ref)                                     |         |
| Prior and no current                         | 42/87                   | 47 (20 to 65)                               | 0.002   | 23/80                   | 51 (18 to 71)                               | 0.007   |
| Current regardless prior                     | 397/632                 | 44 (31 to 55)                               | <0.001  | 255/656                 | 36 (18 to 51)                               | <0.001  |
| <b>Full model with 1 prior season</b>        |                         |                                             |         |                         |                                             |         |
| Never vaccinated                             | 605/448                 | 0 (ref)                                     |         | 457/480                 | 0 (ref)                                     |         |
| Prior and no current                         | 42/87                   | 47 (20 to 65)                               | 0.003   | 23/80                   | 51 (18 to 71)                               | 0.007   |
| Current and no prior                         | 67/110                  | 50 (29 to 65)                               | <0.001  | 39/81                   | 31 (-8 to 55)                               | 0.104   |
| Current and prior                            | 330/522                 | 43 (28 to 55)                               | <0.001  | 216/575                 | 38 (19 to 52)                               | <0.001  |
| <b>Summarized model with 3 prior seasons</b> |                         |                                             |         |                         |                                             |         |
| Never vaccinated                             | 568/400                 | 0 (ref)                                     |         | 426/433                 | 0 (ref)                                     |         |
| Any prior and no current                     | 79/135                  | 37 (12 to 55)                               | 0.007   | 54/127                  | 36 (6 to 57)                                | 0.022   |
| Current regardless prior                     | 397/632                 | 46 (32 to 57)                               | <0.001  | 255/656                 | 37 (18 to 51)                               | <0.001  |
| <b>Full model with 3 prior seasons</b>       |                         |                                             |         |                         |                                             |         |
| Never vaccinated                             | 568/400                 | 0 (ref)                                     |         | 426/433                 | 0 (ref)                                     |         |
| 1–2 prior and no current                     | 53/86                   | 30 (-5 to 53)                               | 0.082   | 39/79                   | 31 (-8 to 56)                               | 0.101   |
| 3 prior and no current                       | 26/49                   | 49 (14 to 70)                               | 0.011   | 15/48                   | 44 (-5 to 70)                               | 0.071   |
| Current and no prior                         | 37/57                   | 52 (24 to 70)                               | 0.002   | 23/44                   | 33 (-18 to 62)                              | 0.164   |
| 1–2 prior and current                        | 101/161                 | 44 (23 to 59)                               | <0.001  | 51/151                  | 48 (23 to 65)                               | 0.001   |
| 3 prior and current                          | 259/414                 | 45 (29 to 58)                               | <0.001  | 181/463                 | 33 (10 to 50)                               | 0.007   |
| <b>Summarized model with 5 prior seasons</b> |                         |                                             |         |                         |                                             |         |
| Never vaccinated                             | 550/381                 | 0 (ref)                                     |         | 409/400                 | 0 (ref)                                     |         |
| Any prior and no current                     | 97/154                  | 36 (12 to 53)                               | 0.006   | 71/160                  | 33 (5 to 53)                                | 0.023   |
| Current regardless prior                     | 397/632                 | 46 (32 to 57)                               | <0.001  | 255/656                 | 38 (19 to 52)                               | <0.001  |
| <b>Full model with 5 prior seasons</b>       |                         |                                             |         |                         |                                             |         |
| Never vaccinated                             | 550/381                 | 0 (ref)                                     |         | 409/400                 | 0 (ref)                                     |         |
| 1–2 prior and no current                     | 50/73                   | 30 (-6 to 53)                               | 0.090   | 34/78                   | 41 (6 to 63)                                | 0.025   |
| 3–5 prior and no current                     | 47/81                   | 40 (9 to 61)                                | 0.015   | 37/82                   | 24 (-20 to 52)                              | 0.236   |
| Current and no prior                         | 30/45                   | 53 (22 to 72)                               | 0.004   | 20/36                   | 31 (-28 to 63)                              | 0.238   |
| 1–2 prior and current                        | 48/85                   | 51 (27 to 68)                               | 0.001   | 25/64                   | 47 (10 to 69)                               | 0.019   |
| 3–5 prior and current                        | 319/502                 | 44 (28 to 57)                               | <0.001  | 210/556                 | 36 (15 to 52)                               | 0.002   |

CI: confidence interval.

<sup>a</sup> Vaccination effect adjusted by age groups (9–44, 45–64, 65–84 and ≥85 years), major chronic conditions, healthcare setting (primary healthcare and hospital), and month of sample collection.

**Supplementary Table S10. Comparison of the effect estimates of influenza vaccination from different models with the estimate that compares people vaccinated in the current season with those unvaccinated in the current and five prior seasons, by influenza season, Navarre, Spain**

| Season and model                      | Vaccination effect, %<br>(95% CI) <sup>a</sup> | Absolute difference of<br>vaccination effect, % |
|---------------------------------------|------------------------------------------------|-------------------------------------------------|
| <b>2011/12</b>                        |                                                |                                                 |
| Summarized model with 5 prior seasons | 33 (-25 to 64)                                 | Reference                                       |
| Summarized model with 3 prior seasons | 33 (-26 to 64)                                 | 0                                               |
| Summarized model with 1 prior season  | 29 (-32 to 62)                                 | -4                                              |
| Only-current-season model             | 20 (-47 to 57)                                 | -13 <sup>b,c</sup>                              |
| <b>2012/13</b>                        |                                                |                                                 |
| Summarized model with 5 prior seasons | 70 (43 to 84)                                  | Reference                                       |
| Summarized model with 3 prior seasons | 69 (41 to 84)                                  | -1                                              |
| Summarized model with 1 prior season  | 66 (36 to 82)                                  | -4                                              |
| Only-current-season model             | 69 (41 to 83)                                  | -1                                              |
| <b>2013/14</b>                        |                                                |                                                 |
| Summarized model with 5 prior seasons | 30 (-2 to 52)                                  | Reference                                       |
| Summarized model with 3 prior seasons | 29 (-3 to 51)                                  | -1                                              |
| Summarized model with 1 prior season  | 30 (0 to 50)                                   | 0                                               |
| Only-current-season model             | 28 (0 to 49)                                   | -2                                              |
| <b>2014/15</b>                        |                                                |                                                 |
| Summarized model with 5 prior seasons | 34 (4 to 54)                                   | Reference                                       |
| Summarized model with 3 prior seasons | 29 (-2 to 50)                                  | -5                                              |
| Summarized model with 1 prior season  | 24 (-8 to 47)                                  | -10 <sup>b</sup>                                |
| Only-current-season model             | 15 (-19 to 39)                                 | -19 <sup>b,c</sup>                              |
| <b>2015/16</b>                        |                                                |                                                 |
| Summarized model with 5 prior seasons | 46 (26 to 60)                                  | Reference                                       |
| Summarized model with 3 prior seasons | 44 (24 to 59)                                  | -2                                              |
| Summarized model with 1 prior season  | 43 (23 to 58)                                  | -3                                              |
| Only-current-season model             | 42 (22 to 56)                                  | -4                                              |
| <b>2016/17</b>                        |                                                |                                                 |
| Summarized model with 5 prior seasons | 32 (10 to 49)                                  | Reference                                       |
| Summarized model with 3 prior seasons | 32 (11 to 49)                                  | 0                                               |
| Summarized model with 1 prior season  | 25 (2 to 42)                                   | -7 <sup>b</sup>                                 |
| Only-current-season model             | 16 (-8 to 35)                                  | -16 <sup>b,c</sup>                              |
| <b>2017/18</b>                        |                                                |                                                 |
| Summarized model with 5 prior seasons | 46 (32 to 57)                                  | Reference                                       |
| Summarized model with 3 prior seasons | 46 (32 to 57)                                  | 0                                               |
| Summarized model with 1 prior season  | 44 (31 to 55)                                  | -2                                              |
| Only-current-season model             | 38 (23 to 49)                                  | -8 <sup>b</sup>                                 |
| <b>2018/19</b>                        |                                                |                                                 |
| Summarized model with 5 prior seasons | 38 (19 to 52)                                  | Reference                                       |
| Summarized model with 3 prior seasons | 37 (18 to 51)                                  | -1                                              |
| Summarized model with 1 prior season  | 36 (18 to 51)                                  | -2                                              |
| Only-current-season model             | 29 (10 to 44)                                  | -9 <sup>b</sup>                                 |

CI, confidence interval.

<sup>a</sup> Vaccination effect adjusted by age groups (9–44, 45–64, 65–84 and ≥85 years), major chronic conditions, healthcare setting (primary healthcare and hospital), and month-season of sample collection.

<sup>b</sup> Absolute difference of vaccine effectiveness of ±5% or over was considered as a bias.

<sup>c</sup> Absolute difference of vaccine effect of ±10% or over was considered as a relevant bias.

## Interaction assessment

As a complementary way of modifying effect evaluation interaction terms between current-season vaccination and prior doses received (0, 1–2 or 3–5 doses) were tested. Current season vaccination maintained a preventive effect as compared to unvaccinated individuals in the current and five prior seasons; however a negative interaction between influenza vaccination in the current and in prior seasons was observed in the overall analysis and in specific analyses of primary healthcare patients, hospitalized patients, patients younger than 65 years old, and against influenza A/H3N2 and influenza B.

**Supplementary Table S11. Effect of current season influenza vaccination and of previous doses and the interaction terms between both, Navarre, Spain, pooled analysis of the 2011/12 to 2018/19 (n=10,356)**

|                              | Adjusted odds ratio (95% CI) <sup>a</sup> | Interaction odds ratio (95% CI) <sup>a</sup> | Interaction p value | Adjusted odds ratio (95% CI) <sup>a</sup> | Interaction odds ratio (95% CI) <sup>a</sup> | Interaction p value |
|------------------------------|-------------------------------------------|----------------------------------------------|---------------------|-------------------------------------------|----------------------------------------------|---------------------|
|                              | <b>All patients</b>                       |                                              |                     | <b>Primary healthcare patients</b>        |                                              |                     |
| <b>Current vaccination</b>   | 0.50 (0.38–0.65)                          |                                              |                     | 0.41 (0.28–0.61)                          |                                              |                     |
| <b>Number of prior doses</b> |                                           |                                              |                     |                                           |                                              |                     |
| 0 doses                      | 1                                         |                                              |                     | 1                                         |                                              |                     |
| 1–2 doses                    | 0.70 (0.58–0.84)                          | 1.59 (1.09–2.32)                             | 0.016               | 0.63 (0.46–0.86)                          | 2.11 (1.11–3.78)                             | 0.022               |
| 3–5 doses                    | 0.57 (0.47–0.71)                          | 2.17 (1.54–3.04)                             | <0.001              | 0.37 (0.21–0.64)                          | 4.77 (2.38–9.56)                             | <0.001              |
|                              | <b>Hospital patients</b>                  |                                              |                     | <b>Aged 9–64 years</b>                    |                                              |                     |
| <b>Current vaccination</b>   | 0.60 (0.42–0.86)                          |                                              |                     | 0.42 (0.30–0.60)                          |                                              |                     |
| <b>Number of prior doses</b> |                                           |                                              |                     |                                           |                                              |                     |
| 0 doses                      | 1                                         |                                              |                     | 1                                         |                                              |                     |
| 1–2 doses                    | 0.75 (0.59–0.95)                          | 1.29 (0.79–2.09)                             | 0.309               | 0.64 (0.50–0.83)                          | 1.79 (1.06–3.04)                             | 0.031               |
| 3–5 doses                    | 0.61 (0.48–0.77)                          | 1.67 (1.10–2.53)                             | 0.017               | 0.54 (0.36–0.81)                          | 2.80 (1.58–4.95)                             | <0.001              |
|                              | <b>Aged ≥65 years</b>                     |                                              |                     | <b>Influenza A/H1N1</b>                   |                                              |                     |
| <b>Current vaccination</b>   | 0.65 (0.42–0.99)                          |                                              |                     | 0.55 (0.35–0.87)                          |                                              |                     |
| <b>Number of prior doses</b> |                                           |                                              |                     |                                           |                                              |                     |
| 0 doses                      | 1                                         |                                              |                     | 1                                         |                                              |                     |
| 1–2 doses                    | 0.81 (0.60–1.08)                          | 1.22 (0.70–2.15)                             | 0.482               | 0.76 (0.55–1.04)                          | 0.89 (0.45–1.77)                             | 0.749               |
| 3–5 doses                    | 0.62 (0.48–0.80)                          | 1.63 (1.01–2.65)                             | 0.047               | 0.55 (0.37–0.81)                          | 1.57 (0.86–2.86)                             | 0.143               |
|                              | <b>Influenza A/H3N2</b>                   |                                              |                     | <b>Influenza B</b>                        |                                              |                     |
| <b>Current vaccination</b>   | 0.64 (0.45–0.91)                          |                                              |                     | 0.28 (0.16–0.48)                          |                                              |                     |
| <b>Number of prior doses</b> |                                           |                                              |                     |                                           |                                              |                     |
| 0 doses                      | 1                                         |                                              |                     | 1                                         |                                              |                     |
| 1–2 doses                    | 0.79 (0.61–1.01)                          | 1.45 (0.88–2.38)                             | 0.150               | 0.52 (0.36–0.75)                          | 3.53 (1.68–7.41)                             | 0.001               |
| 3–5 doses                    | 0.61 (0.46–0.81)                          | 2.30 (1.30–3.15)                             | 0.006               | 0.62 (0.42–0.91)                          | 2.99 (1.52–5.85)                             | <0.001              |

CI: confidence interval.

<sup>a</sup> Odds ratio adjusted by age groups (9–44, 45–64, 65–84 and ≥85 years), major chronic conditions, healthcare setting (primary healthcare and hospital), and month-season of sample collection. Influenza A/H1N1 analysis includes 2012/13, 2013/14, 2015/16, 2017/18 and 2018/19 seasons. Influenza A/H3N2 analysis includes 2011/12, 2013/14, 2014/15, 2015/16, 2016/17, 2017/18 and 2018/19 seasons. Influenza B analysis includes 2011/12, 2012/13, 2014/15, 2015/16 and 2017/18 seasons.
